# Supplementary material for: Shear‐dependent platelet aggregation size
Source: PubMed Central journal article supplement (PMC7818454; doi:10.1111/aor.13783), 2020-08-15
Supplement: AOR-44-1286-s001.pdf [file AOR-44-1286-s001.pdf]

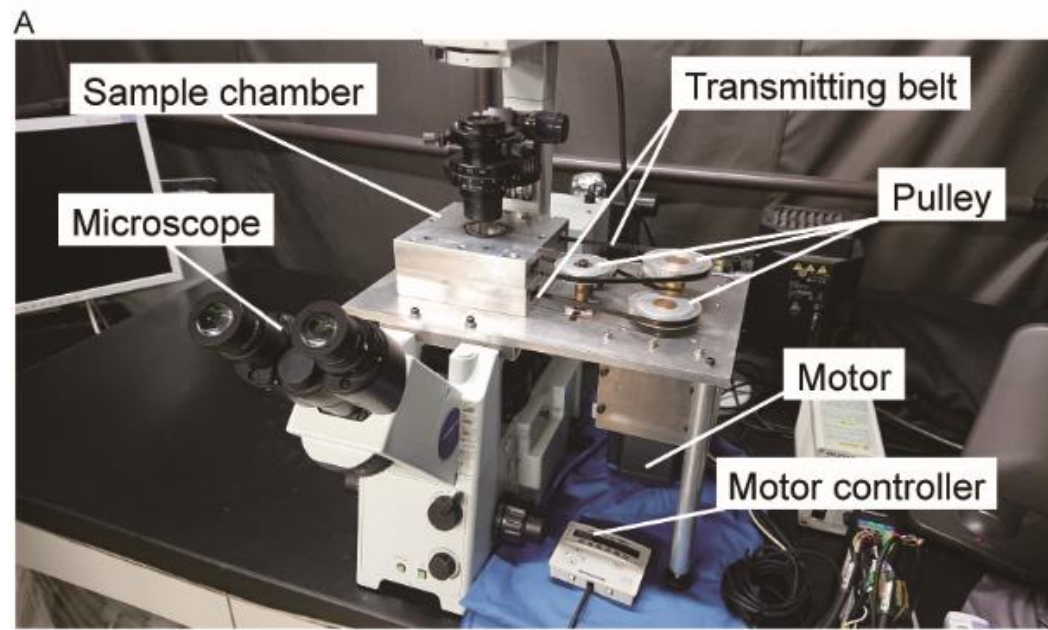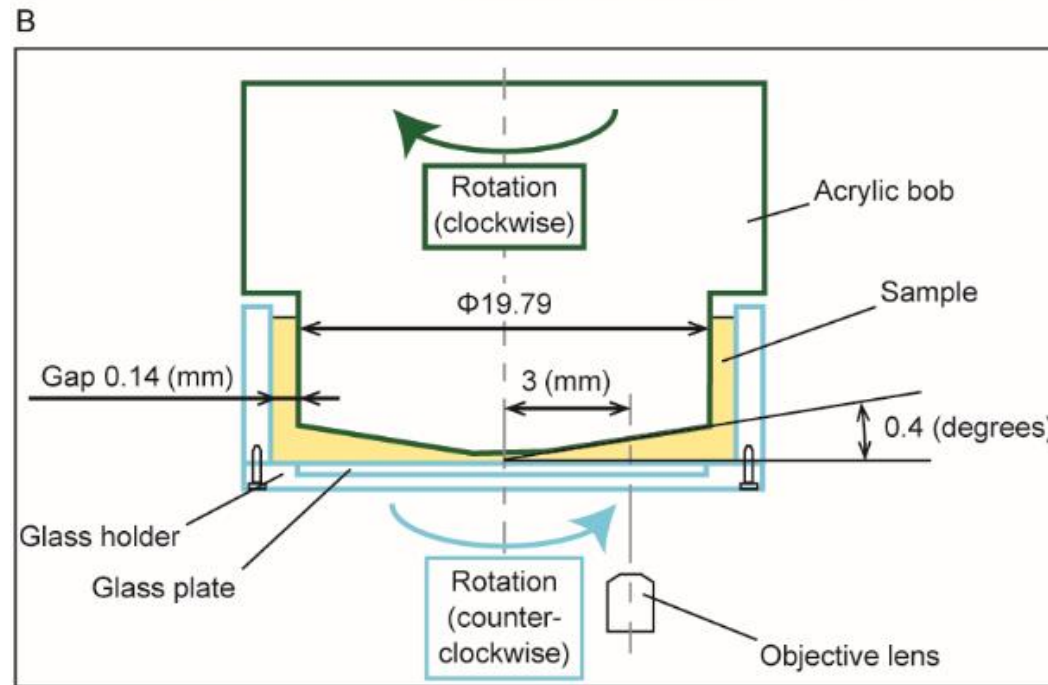

Figure 1.

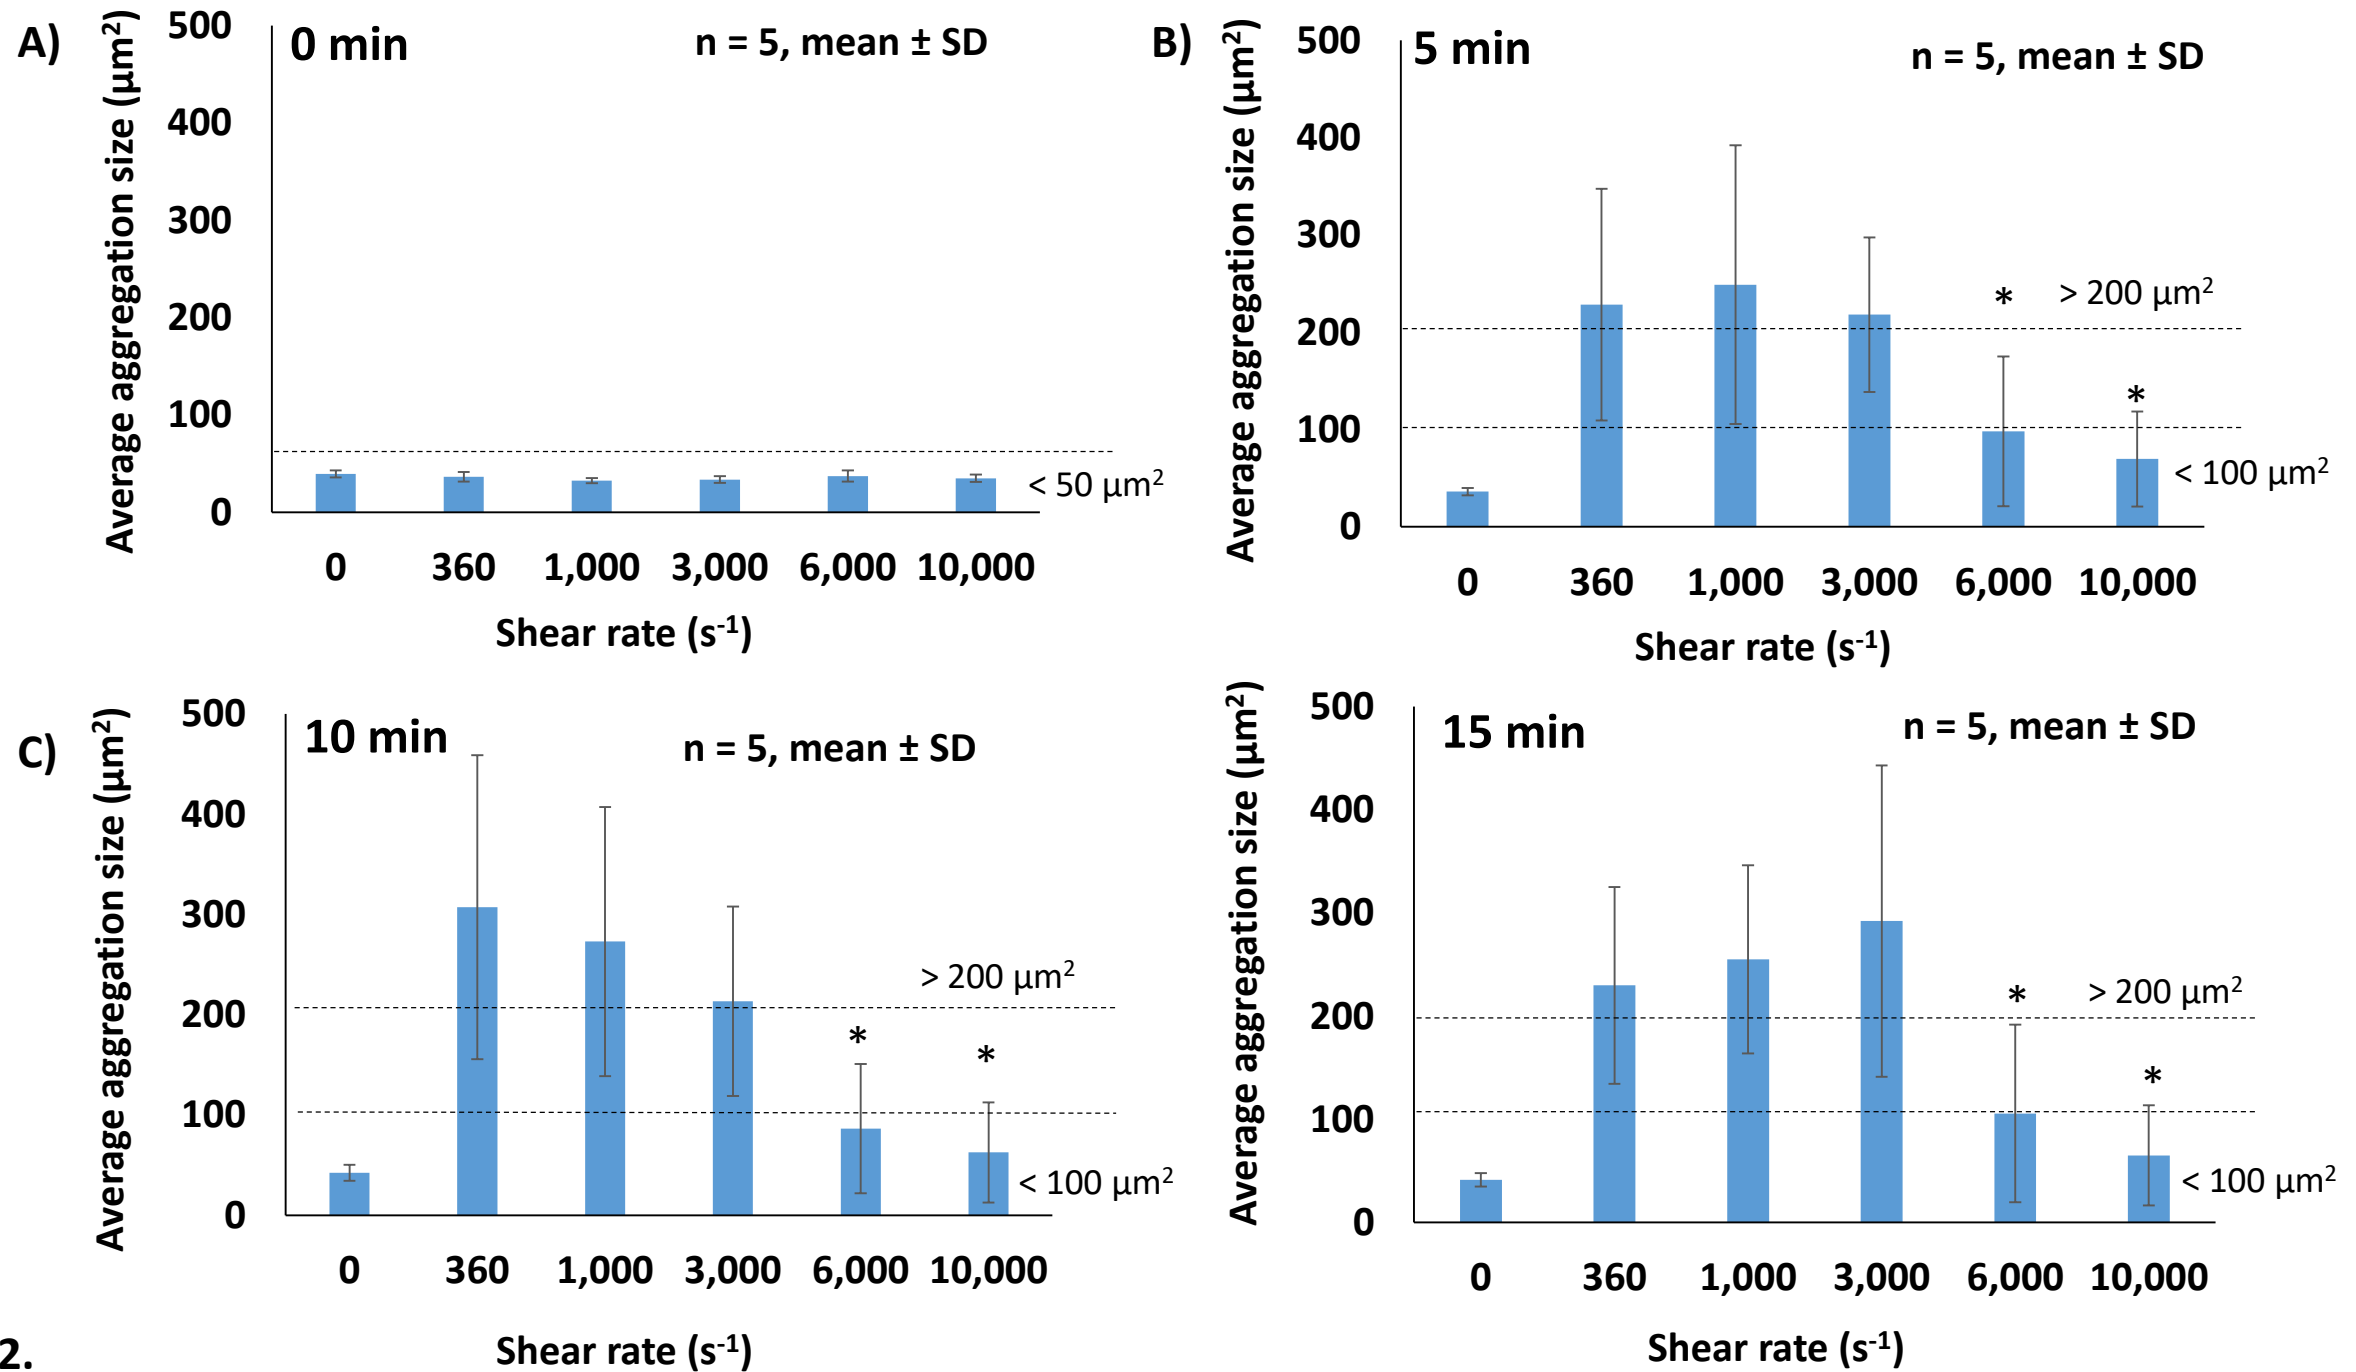

Figure 2.

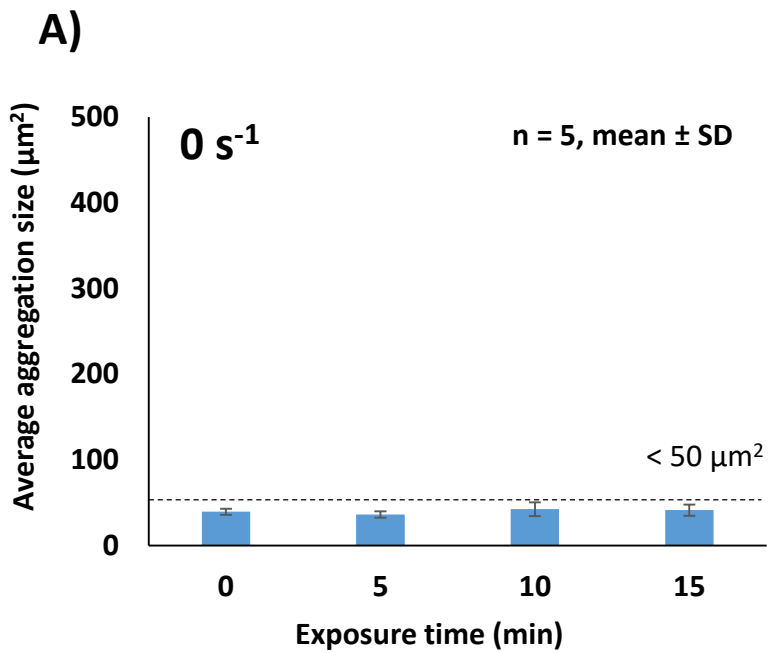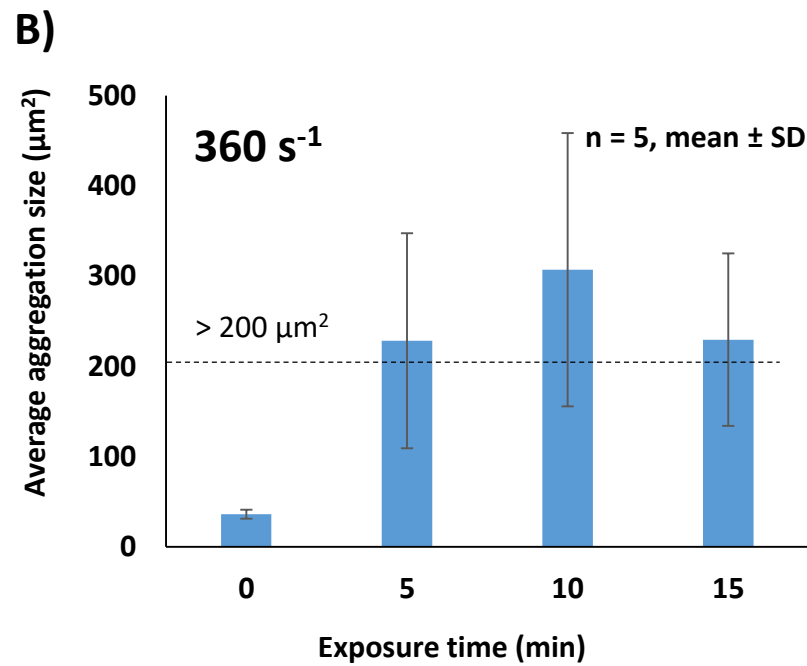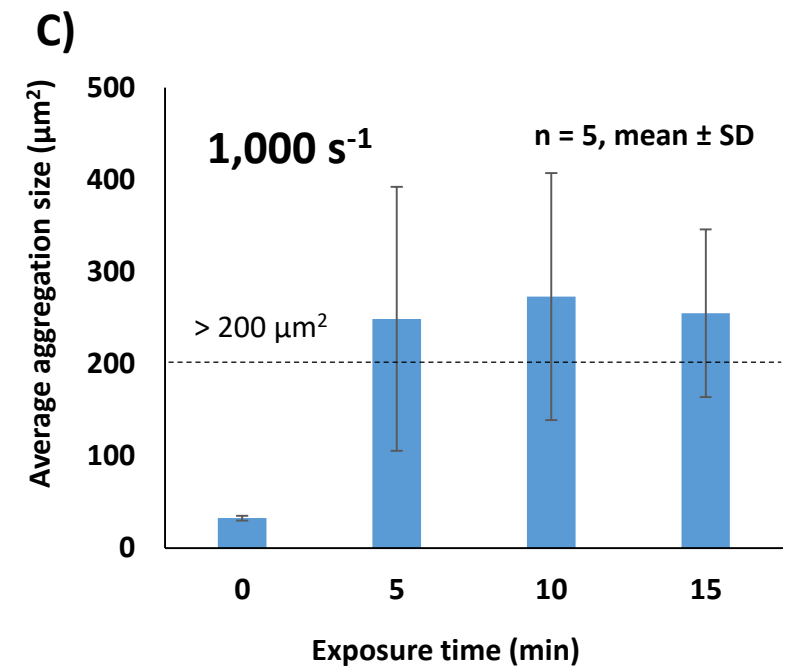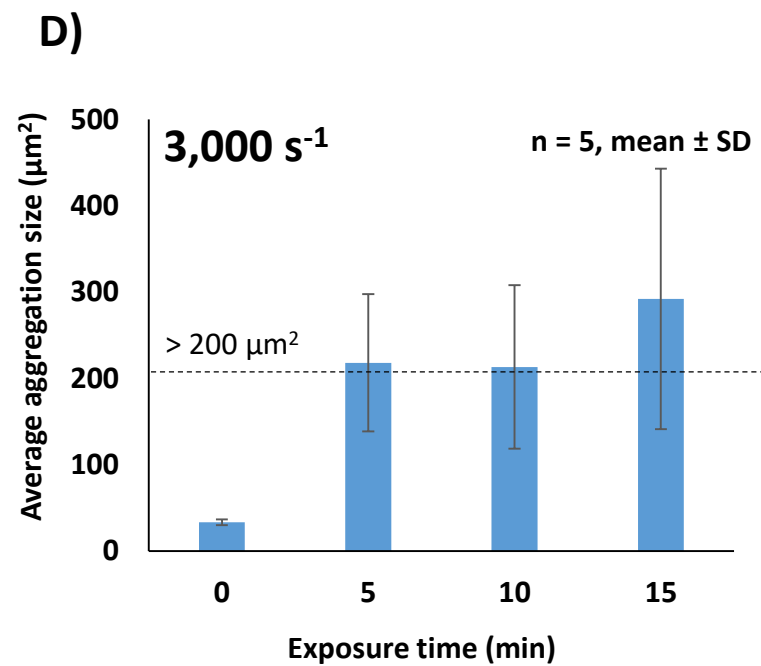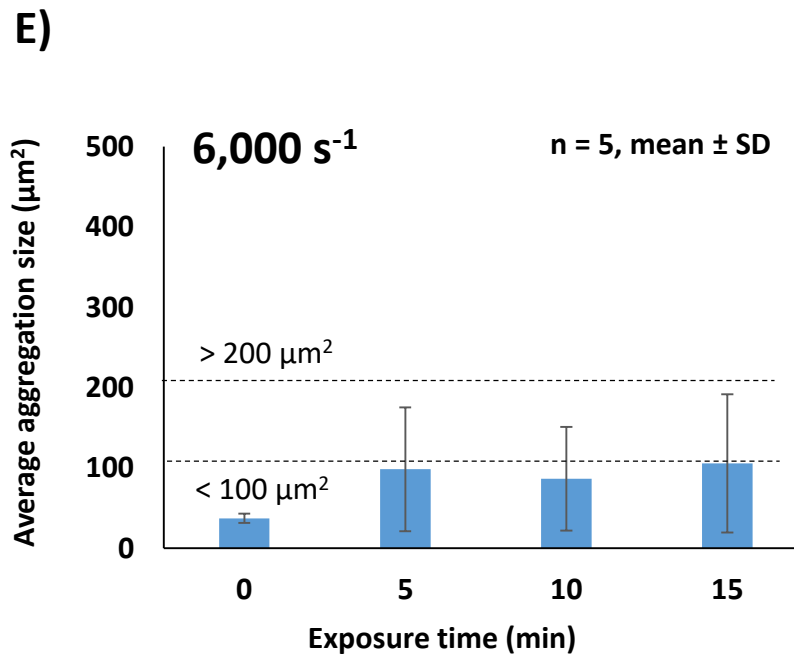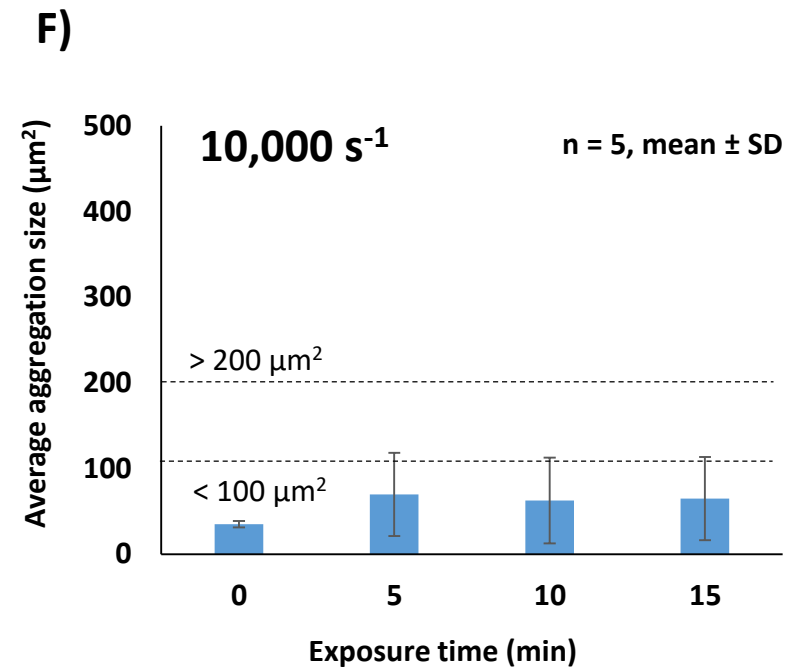

**Figure 3.**

A)

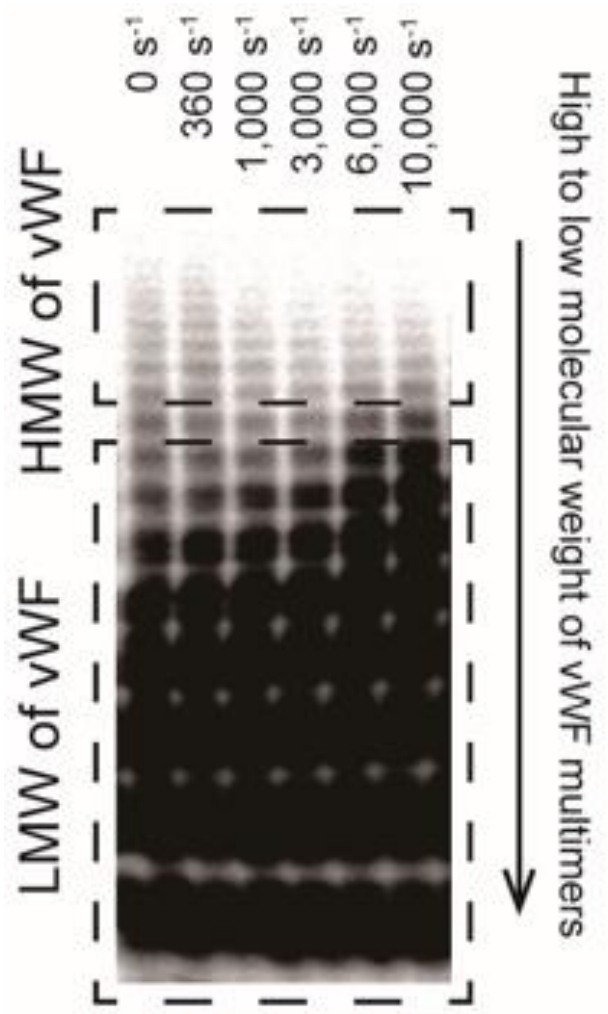

B)

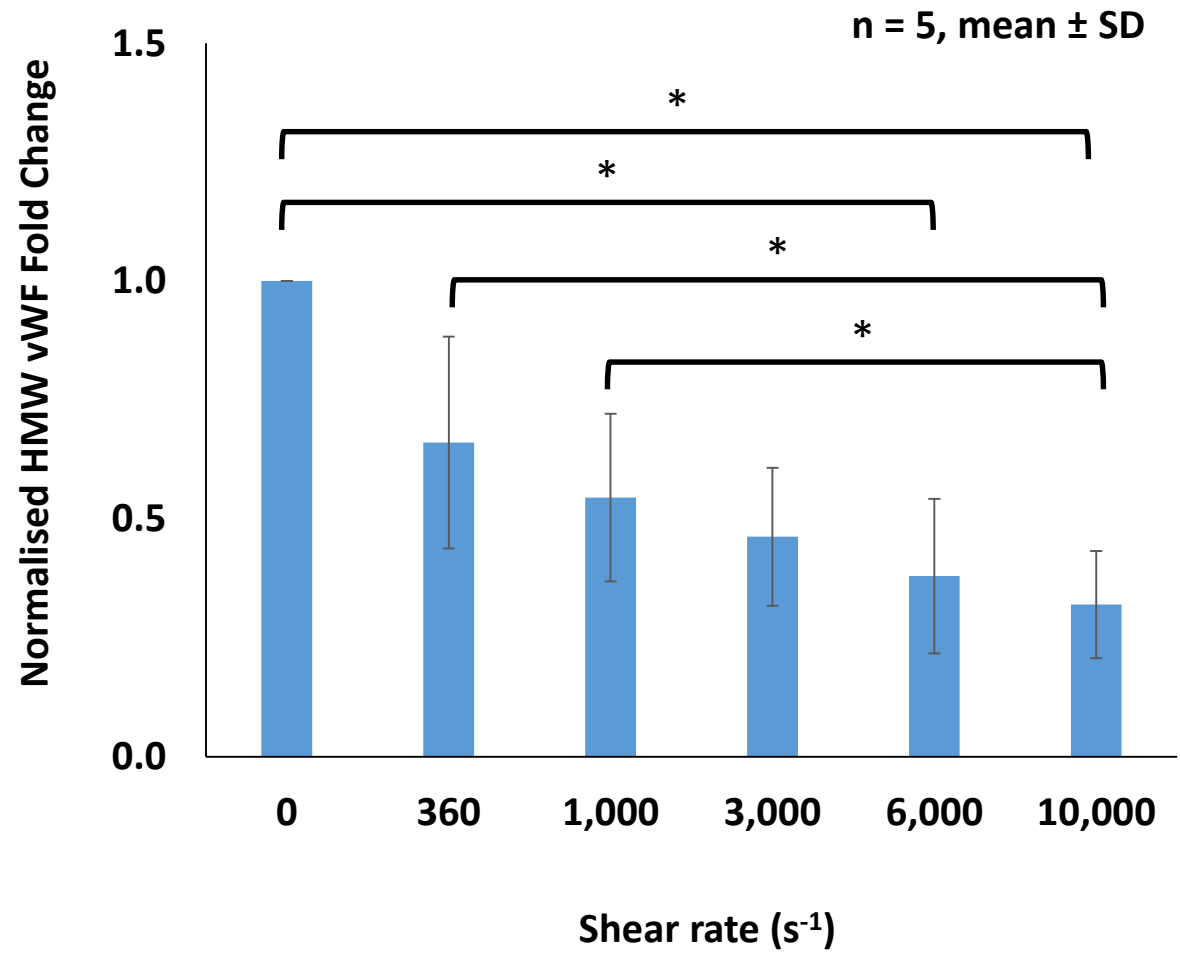

Figure 4.

A)

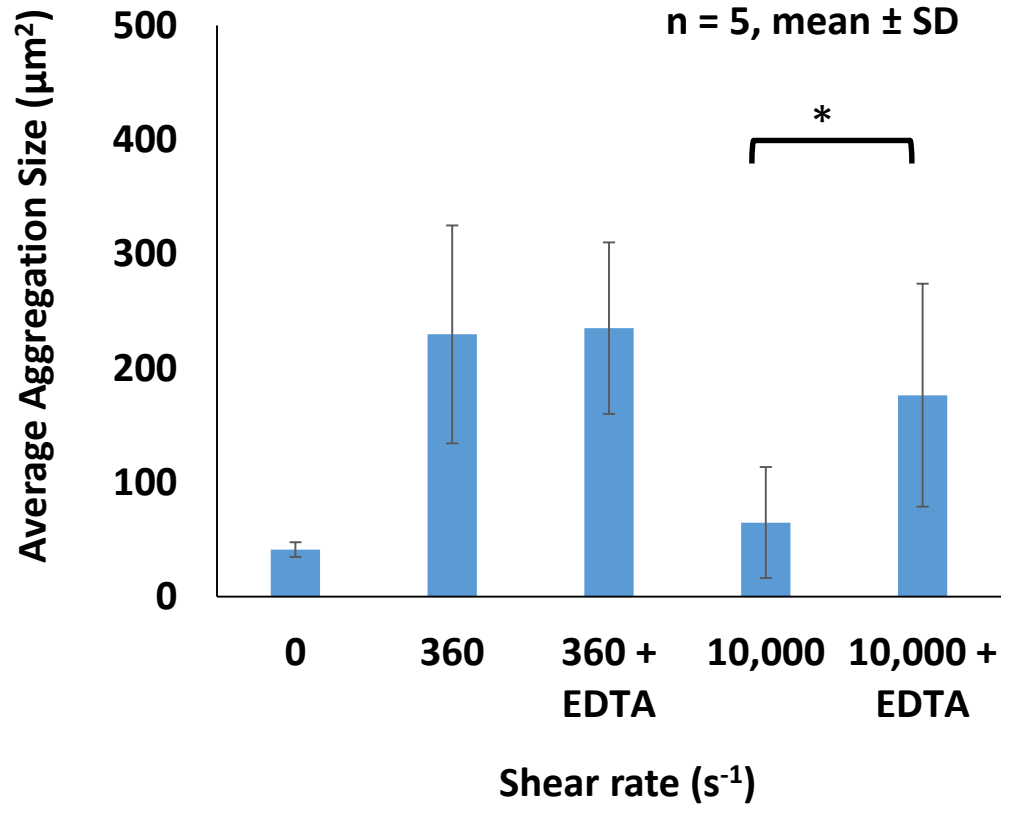

B)

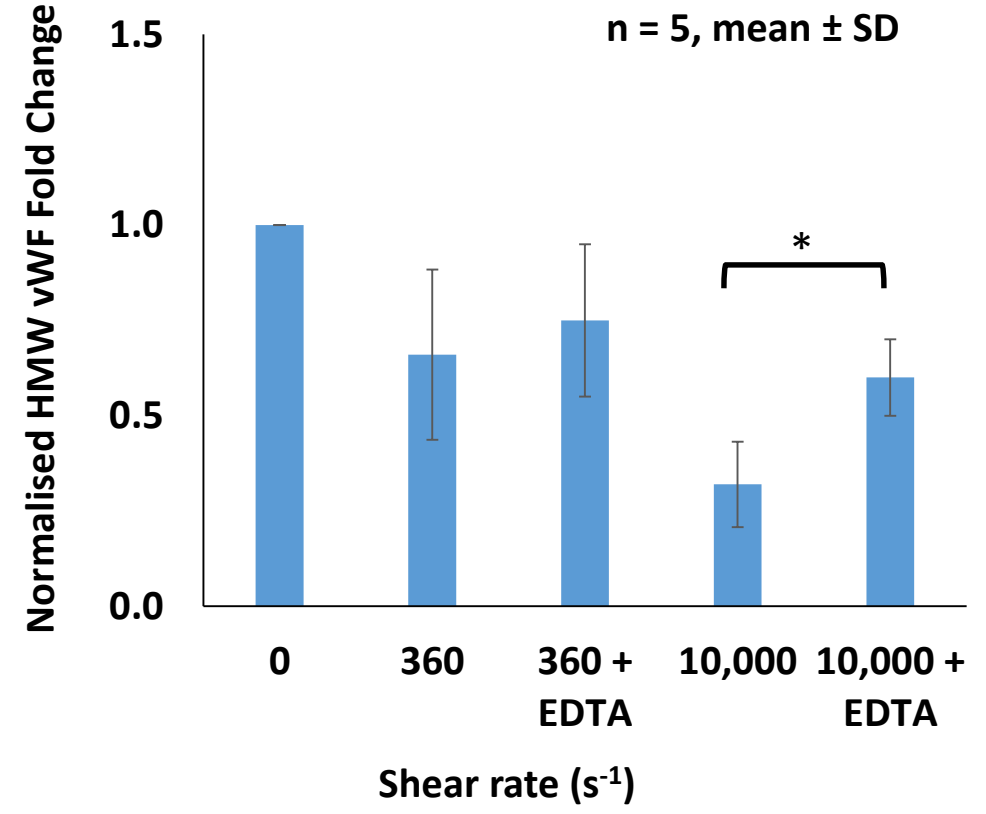

Figure 5.

A

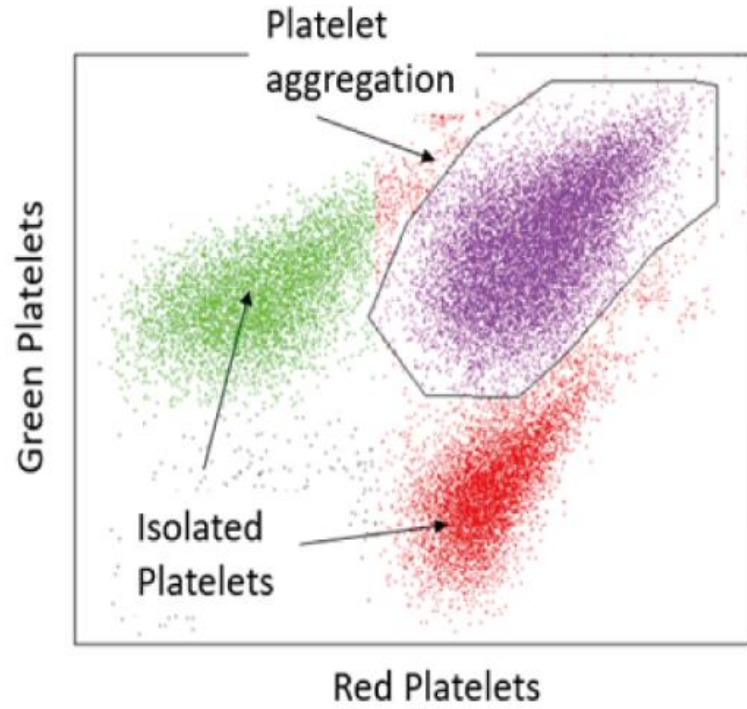

B

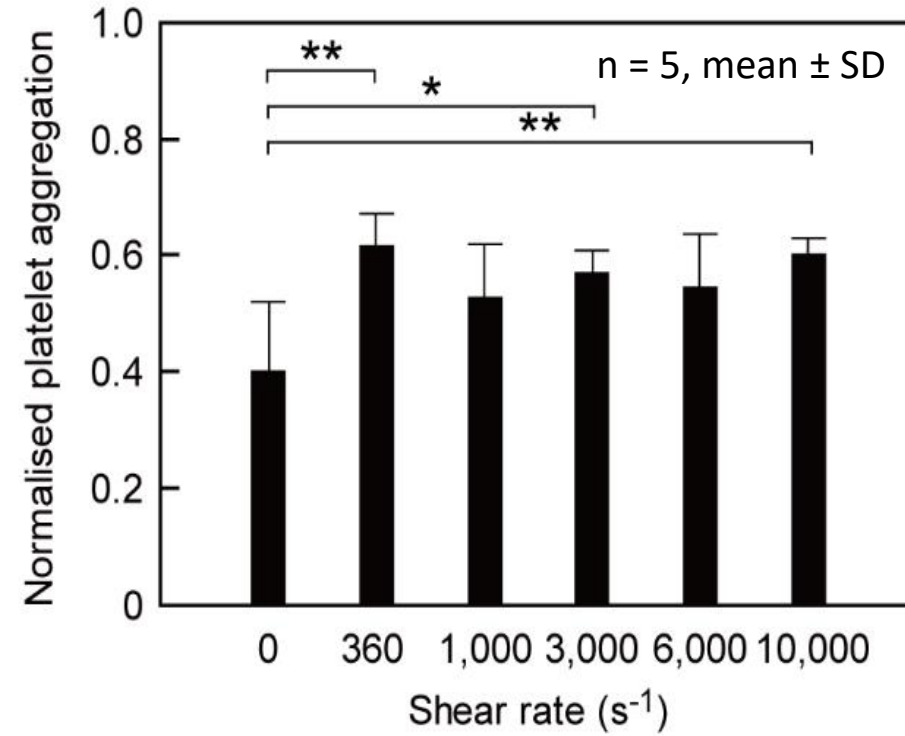

Supplemental Figure 1.
